# Supplementary material
Source: Elsevier journal article supplement (https://www.sciencedirect.com/science/article/pii/S0048712018300690)
Supplement: mmc1 [file S0048712018300690:mmc1.docx]

| Section/topic | **#** | **Checklist item** | **Reported on page** |
| --- | --- | --- | --- |
| **TÍTULO** | | |  |
| Título | 1 | Identificar la publicación revisión sistemética, metaanálisis o ambas. | 1ª página |
| **RESUMEN** | | |  |
| Resumen estructurado | 2 | incluir antecedentes, objetivos, fuente de los datos, criterios de elegibilidad de los estudios, participantes e intervenciones, evaluación de los estudios y métodos de síntesis, resultados, limitaciones, conclusiones e implicaciones de los hallazgos principales, número de registro de la RS. | Pag.1 |
| **INTRODUCCIÓN** | | |  |
| Justificación | 3 | Implica describir lo que se conoce del tema y comentar la necesidad de la RS haciendo referencia a la importancia del problema y a la controversia existente sobre las intervenciones que se desea revisar | Pag.2-3 |
| Objetivos | 4 | Plantear de forma explícita las preguntas que se desea contestar en relación con los participantes, las intervenciones, las comparaciones, los resultados y el diseño de los estudios (PICOS) | Pag.4 |
| **MÉTODOS** | | |  |
| Protocolo y registro | 5 | Indicar si existe un protocolo de revisión al que se pueda acceder y si está disponible, la información sobre el registro, incluyendo su número de registro. |  |
| Criterios de elegibilidad | 6 | Especificar las características de los estudios (ej. Cada uno de los elementos de PICOS, duración del seguimiento) y de las características de la búsqueda (por ej años abarcados, idiomas o estatus de la publicación) utilizadas como criterios de elegibilidad y su justificación. | Pag.5 |
| Fuentes de información | 7 | Describir todas las fuentes de información (por ej. las bases de datos y periodos de búsqueda, contacto con los autores para identificar estudios adicionales, etc. Y fecha de la última búsqueda realizada. | Pag.5 |
| Búsqueda | 8 | Presentar la estrategia completa de búsqueda electrónica, en al menos una base de datos, incluyendo los límites utilizados, de tal forma que pueda ser reproducible. | Pag.5  Tabla 1 |
| Selección de los estudios | 9 | Especificar el proceso de selección de os estudios con los criterios de inclusión y exclusión. Definir la elegibilidad de os estudios incluidos en la RS y cuando sea pertinente en el MA. | Pág. 5  Figura 1 |
| Proceso de extracción de datos | 10 | Describir los métodos para la extracción de datos de las publicaciones (por ej. Formularios pilotados por duplicado y de forma independiente) y cualquier proceso para obtener y confirmar datos por parte de los investigadores | Pág. 6 |
| Lista de datos | 11 | Listar y definir todas las variables para las que se buscaron datos (por ej. PICOS,fuente de financiación) y cualquier asunción o simplificación que se haya hecho. |  |
| Riesgo de sesgo en los estudios | 12 | Describir los métodos utilizados para evaluar el riesgo de sesgo de los estudios individuales (especificar si se realizó a nivel de estudios o de resultados) y cómo esa información se ha utilizado en la síntesis de datos. | Pág. 5  Tabla 2 |
| Medidas de resumen | 13 | Especificar las principales medidas de resumen (por ej. razón de riesgos o diferencia de medias) |  |
| Síntesis de resultados | 14 | Describir los métodos para manejar los datos y combinar resultados de los estudios, cuando esto es posible, incluyendo medidas de consistencia para cada MA. |  |
| **Section/topic** | **#** | **Checklist item** | **Reported on page** |
| Riesgo de sesgo entre los estudios | 15 | Especificar cualquier evaluación del riesgo de sesgo que pueda afectar la evidencia acumulativa (por ej. sesgo de publicación o comunicación selectiva) | Pág. 6 |
| Análisis adicionales | 16 | Describir los métodos adicionales de análisis (por ej. análisis de sensibilidad o de subgrupos metarregresión) en el caso de que se hiciera, indicar cuales fueron pre-especificados. |  |
| **RESULTADOS** | | |  |
| Selección de estudios | 17 | Facilitar el número de estudios cribados, evaluados para su elegibilidad e incluidos en la RS, y detallar las razones para su exclusión en cada etapa, idealmente mediante un diagrama de flujos. El diagrama de flujo se convierte en un elemento esencial en las RS, en donde se valora el número de registros en cada etapa: identificación, cribado, elegibilidad e inclusión. | Figura 1 |
| Características de los estudios | 18 | Para cada estudio presentar las características para las que se extrajeron datos (por ej. tamaño, PICOS y duración del seguimiento) y proporcionar las citas bibliográficas. | Pág. 6  Tabla 2 |
| Riesgo de sesgo en los estudios | 19 | Presentar datos sobre el riesgo de sesgo en cada estudio y si está disponible cualquier evaluación de sesgo en los resultados (ver item 12). | Pág. 5  Pág.10 |
| Resultados de los estudios individuales | 20 | Para cada resultado considerado en cada estudio (beneficios o daños) presentara a) el dato resumen para cada grupo de intervención, b) la estimación del efecto con su intervalo de confianza, idealmente en forma gráfica mediante un diagrama de bosque (forest plot). | Tabla 2 |
| Síntesis de resultados | 21 | Presentar los resultados de todos los MA realizados, incluyendo los intervalos de confianza y las medidas de consistencia. | Tabla 2 |
| Riesgo de sesgo entre sujetos | 22 | Presentar los resultados de cualquier evaluación del riesgo de sesgo entre los estudios (ver Item 15). |  |
| Análisis adicionales | 23 | Facilitar los resultados de cualquier análisis adicional, en el caso de que haya sido realizado (por ej. análisis de sensibilidad o de subgrupos, metarregresión) [ver Item 16]). |  |
| **DISCUSIÓN** | | |  |
| Resumen de la evidencia | 24 | Resumir los hallazgos principales, incluyendo la fortaleza de las evidencias para cada resultado principal; considerar su relevancia para grupos clave (por ej. proveedores cuidados, usuarios y decisores en salud). | Pág. 6-10 |
| Limitaciones | 25 | Discutir las limitaciones de los estudios y de los resultados (p ej. Riesgo de sesgo) y de la revisión (por ej. obtención incompleta de los estudios identificados o comunicación selectiva). | Pag.10 |
| Conclusiones | 26 | Proporcionar una interpretación general de los resultados en el contexto de otras evidencias, así como las implicaciones para la futura investigación. En las RS/MA es esencial los apartados finales de “implicaciones para la práctica clínica” e “implicaciones para la investigación” | Pag.10 y11 |
| **FINANCIACIÓN** | | |  |
| Funding | 27 | Describir las fuentes de financiación de la RS y otro tipo de apoyos (por ej. aporte de los datos), así como el papel de los finaciadores. |  |

*From:*  Moher D, Liberati A, Tetzlaff J, Altman DG, The PRISMA Group (2009). Preferred Reporting Items for Systematic Reviews and Meta-Analyses: The PRISMA Statement. PLoS Med 6(6): e1000097. doi:10.1371/journal.pmed1000097 For more information, visit: **www.prisma-statement.org**. Page 2 of 2
